# Supplementary material for: The alternative reality of plant mitochondrial DNA: One ring does not rule them all
Source: PubMed Central journal article supplement (PMC6742443; doi:10.1371/journal.pgen.1008373), 2019-08-30
Supplement: pgen.1008373.s004.pdf [file pgen.1008373.s004.pdf]

*L.sativa* Illumina mate-pair libraries (2.5 + 10 kb)

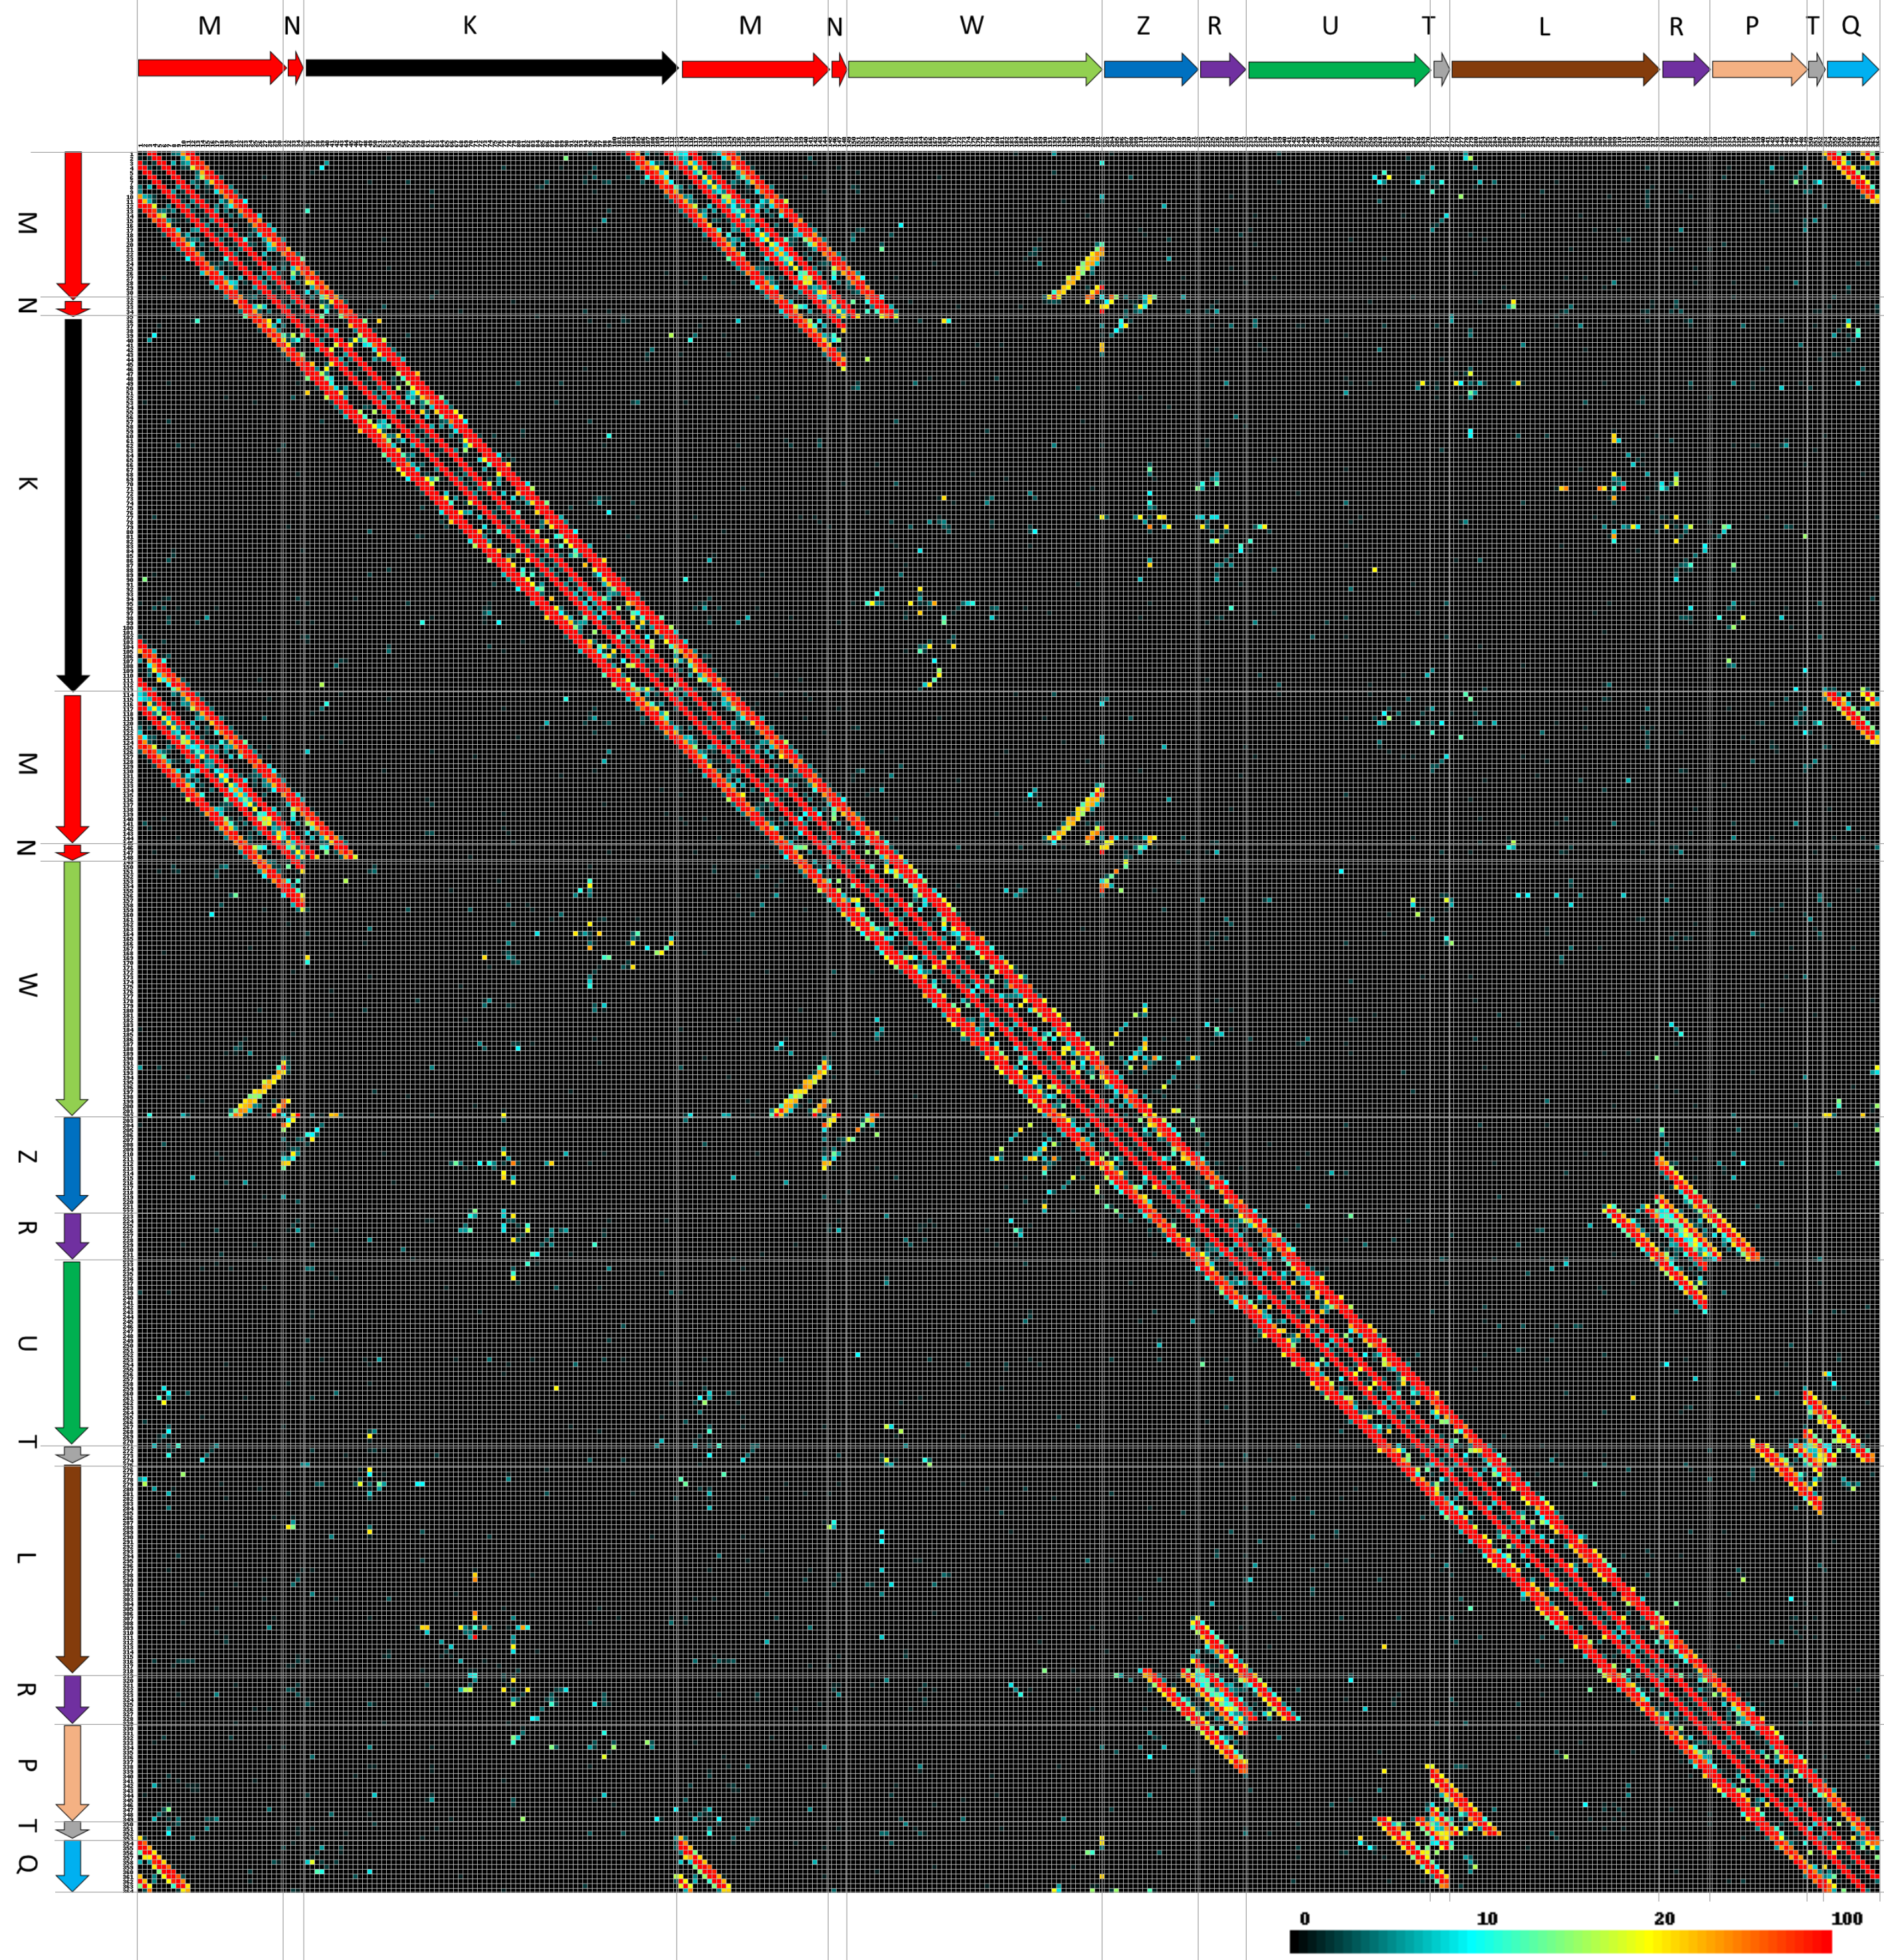

S4A Figure

*L.serriola* Illumina mate-pair libraries (2.5 + 10 kb)

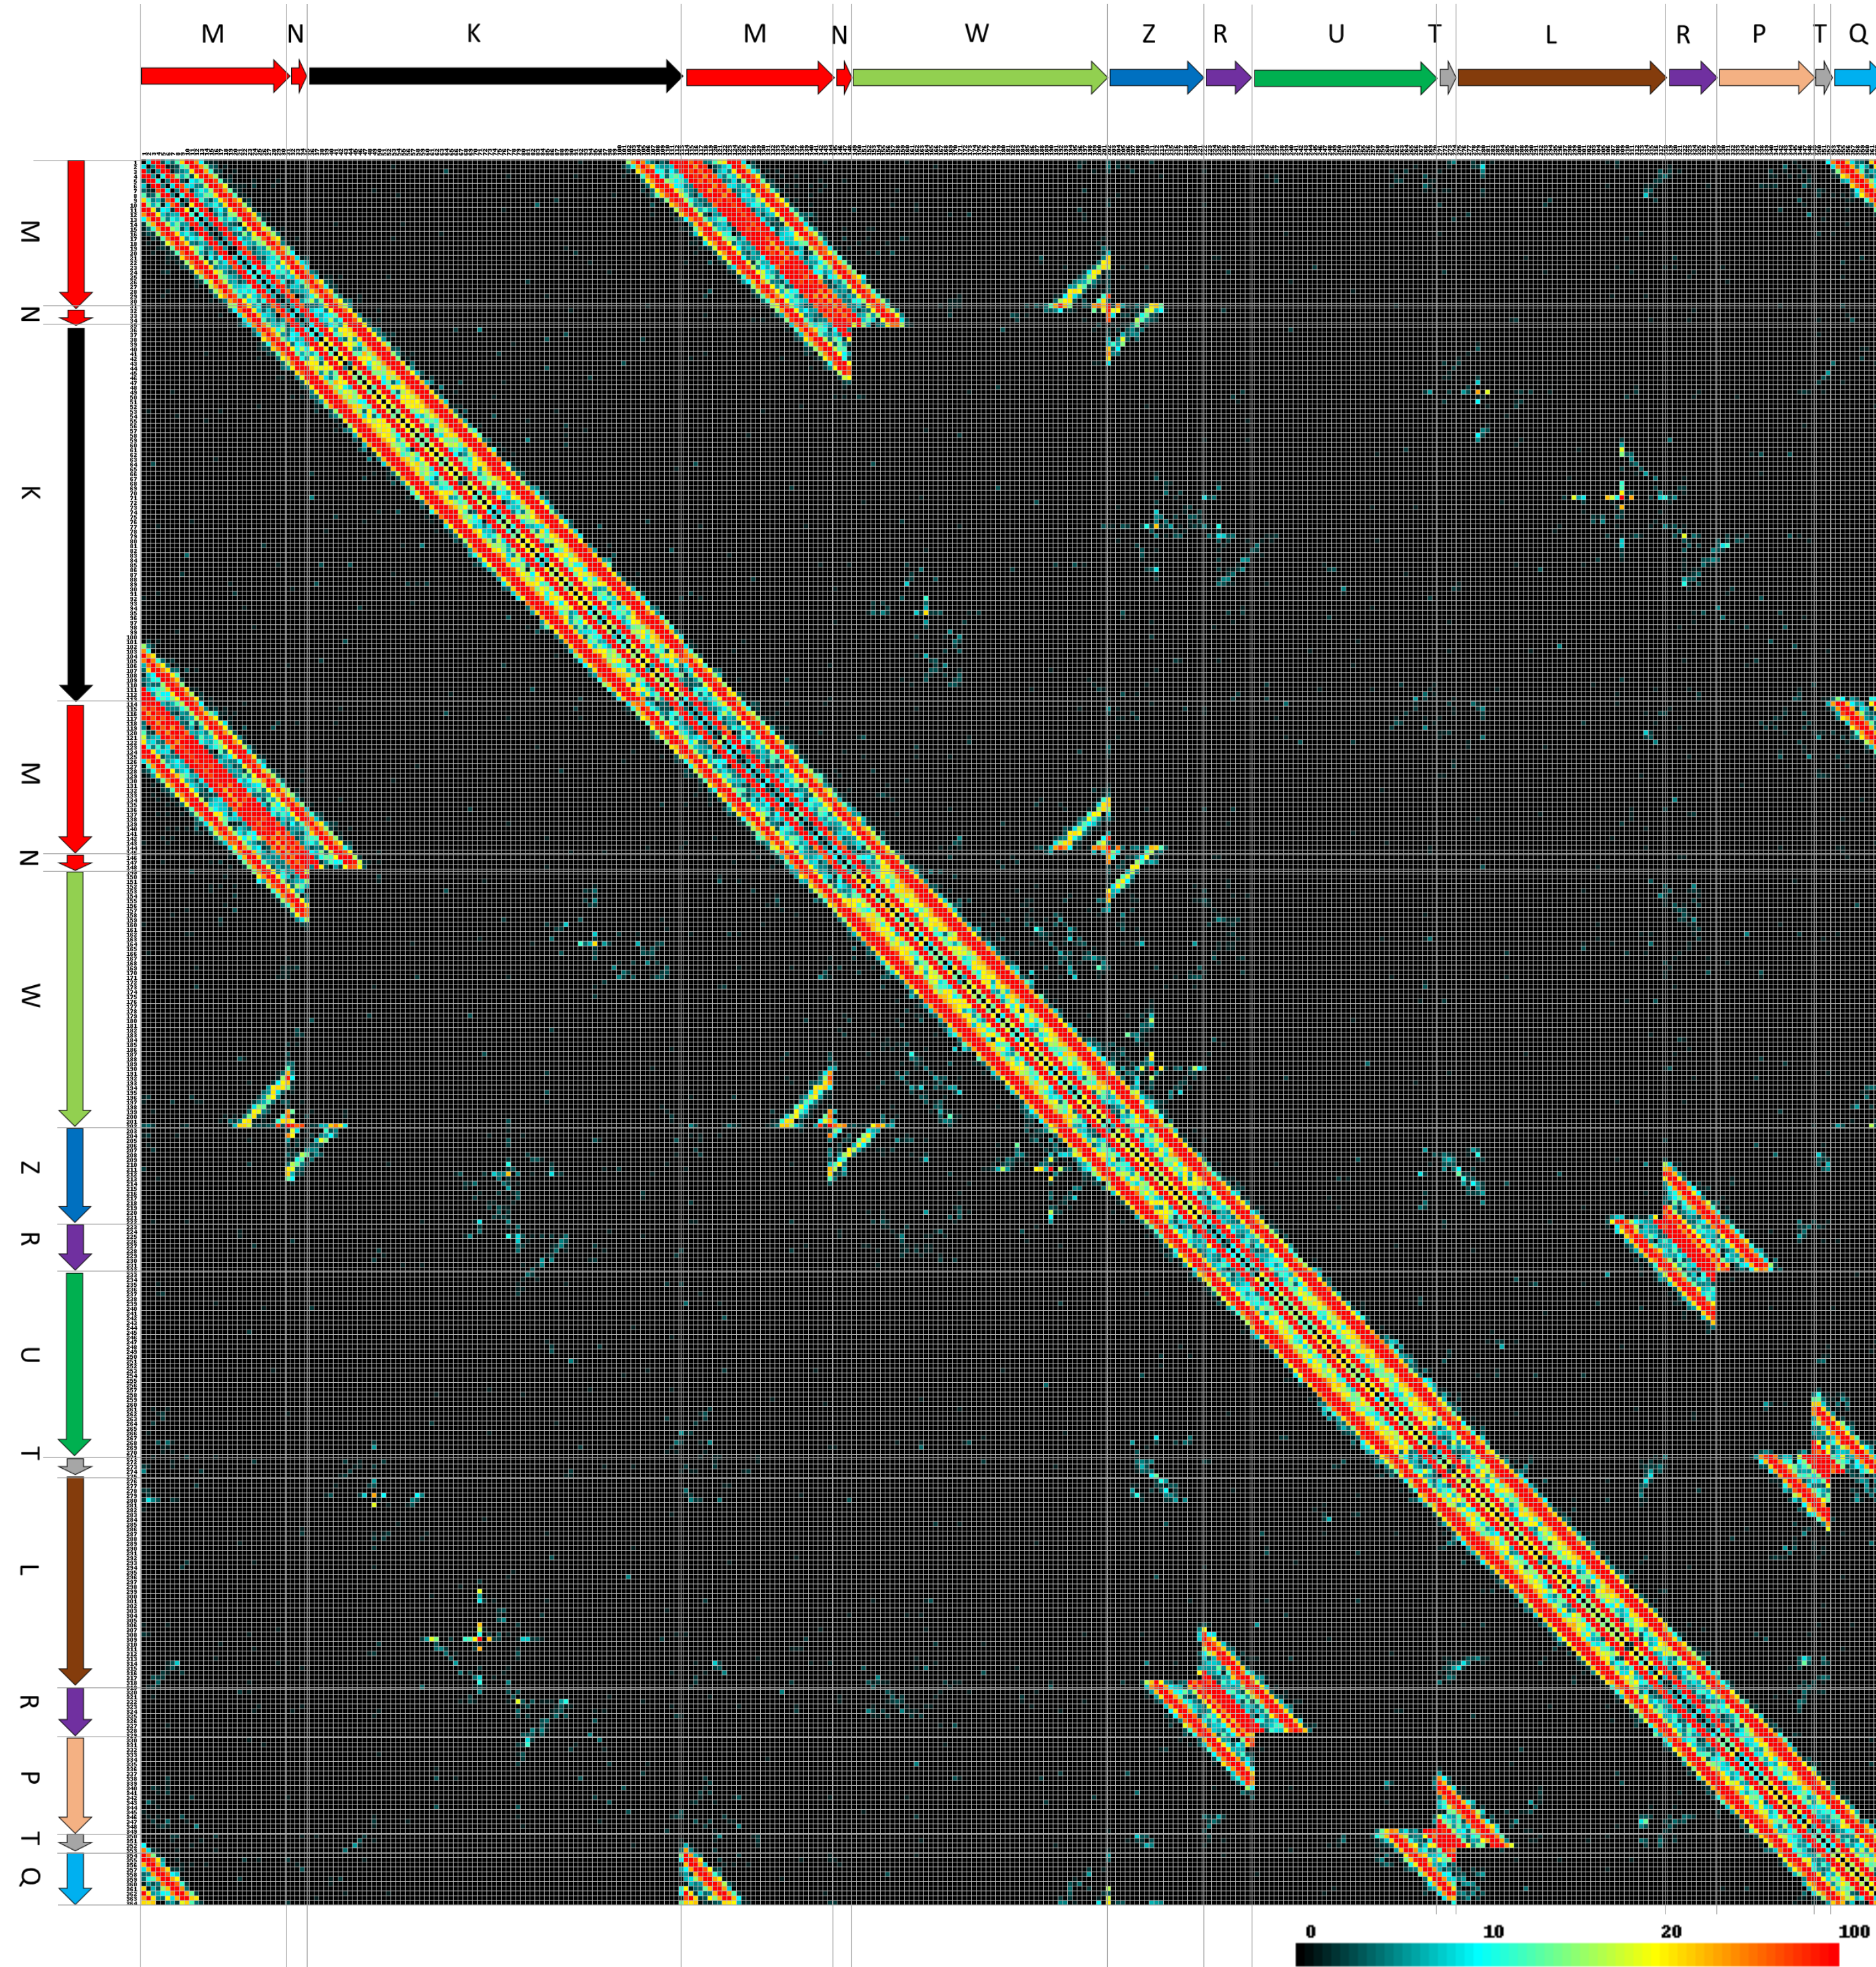

S4B Figure

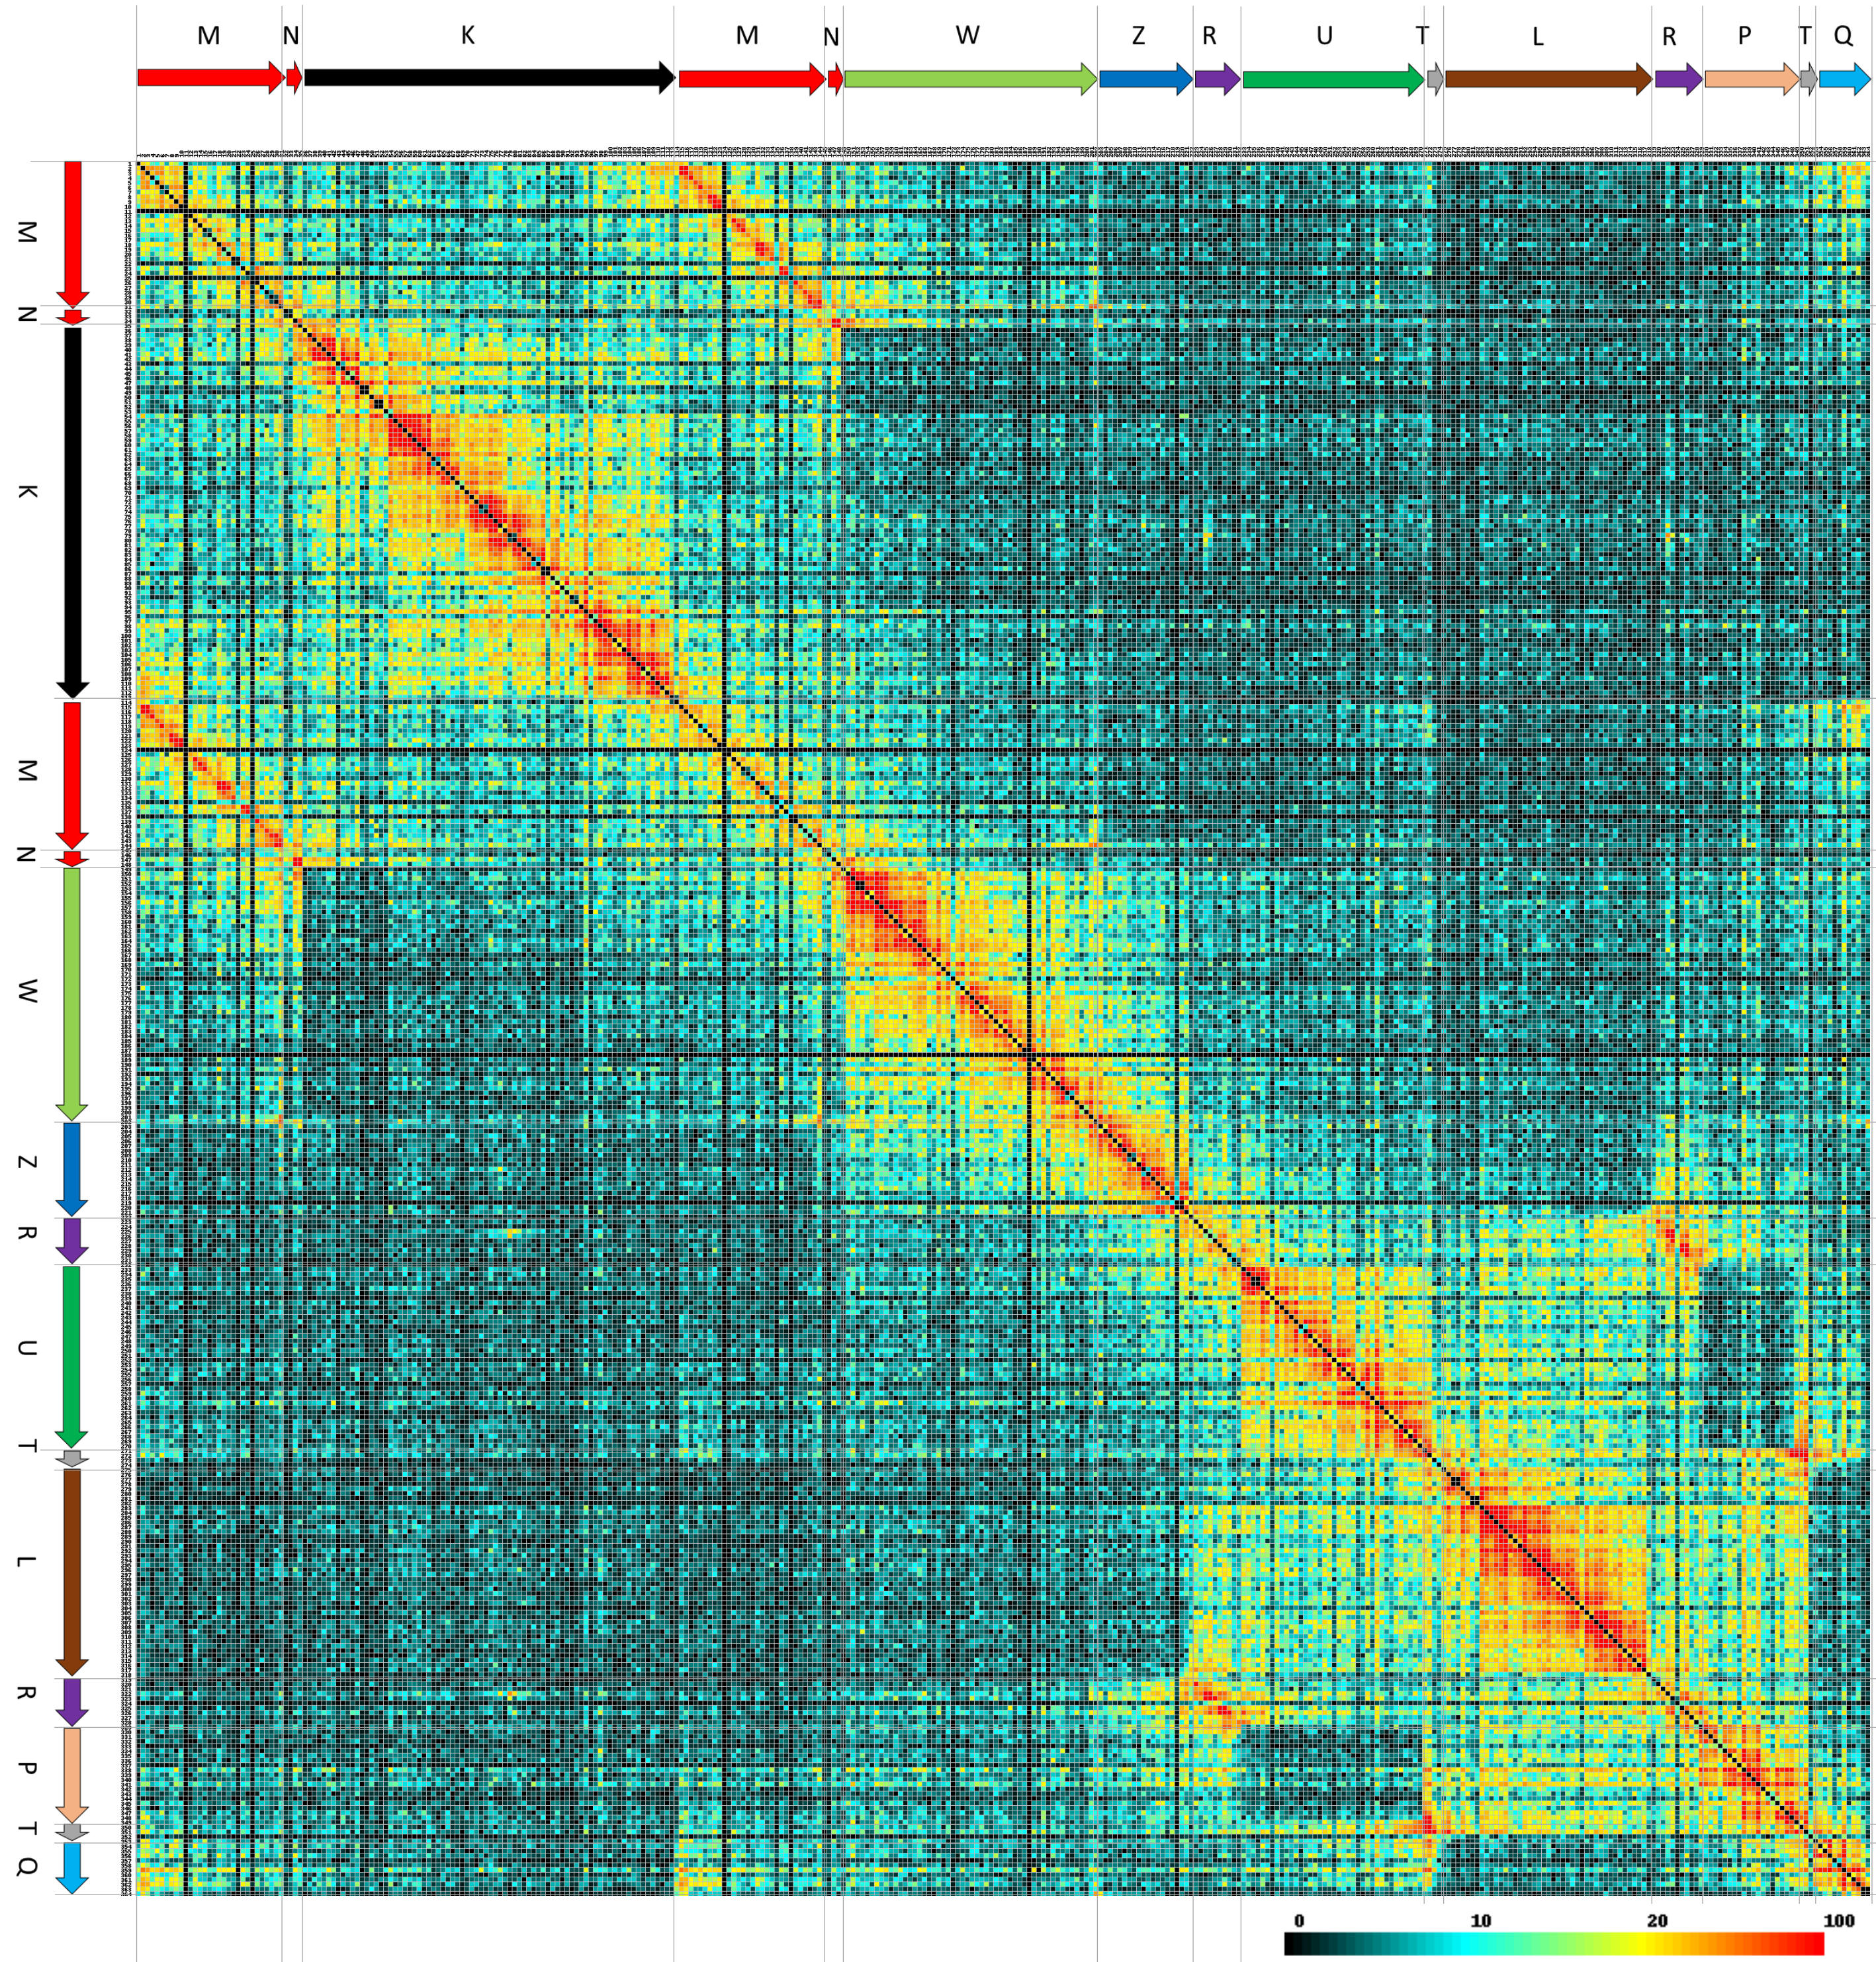

S4C Figure
