# Supplementary material for: The alternative reality of plant mitochondrial DNA: One ring does not rule them all
Source: PubMed Central journal article supplement (PMC6742443; doi:10.1371/journal.pgen.1008373), 2019-08-30
Supplement: pgen.1008373.s008.pdf [file pgen.1008373.s008.pdf]

Reanalysis of the mitochondrial genome of *Leucaena trichandra* with PacBio and Illumina mate-pair reads.

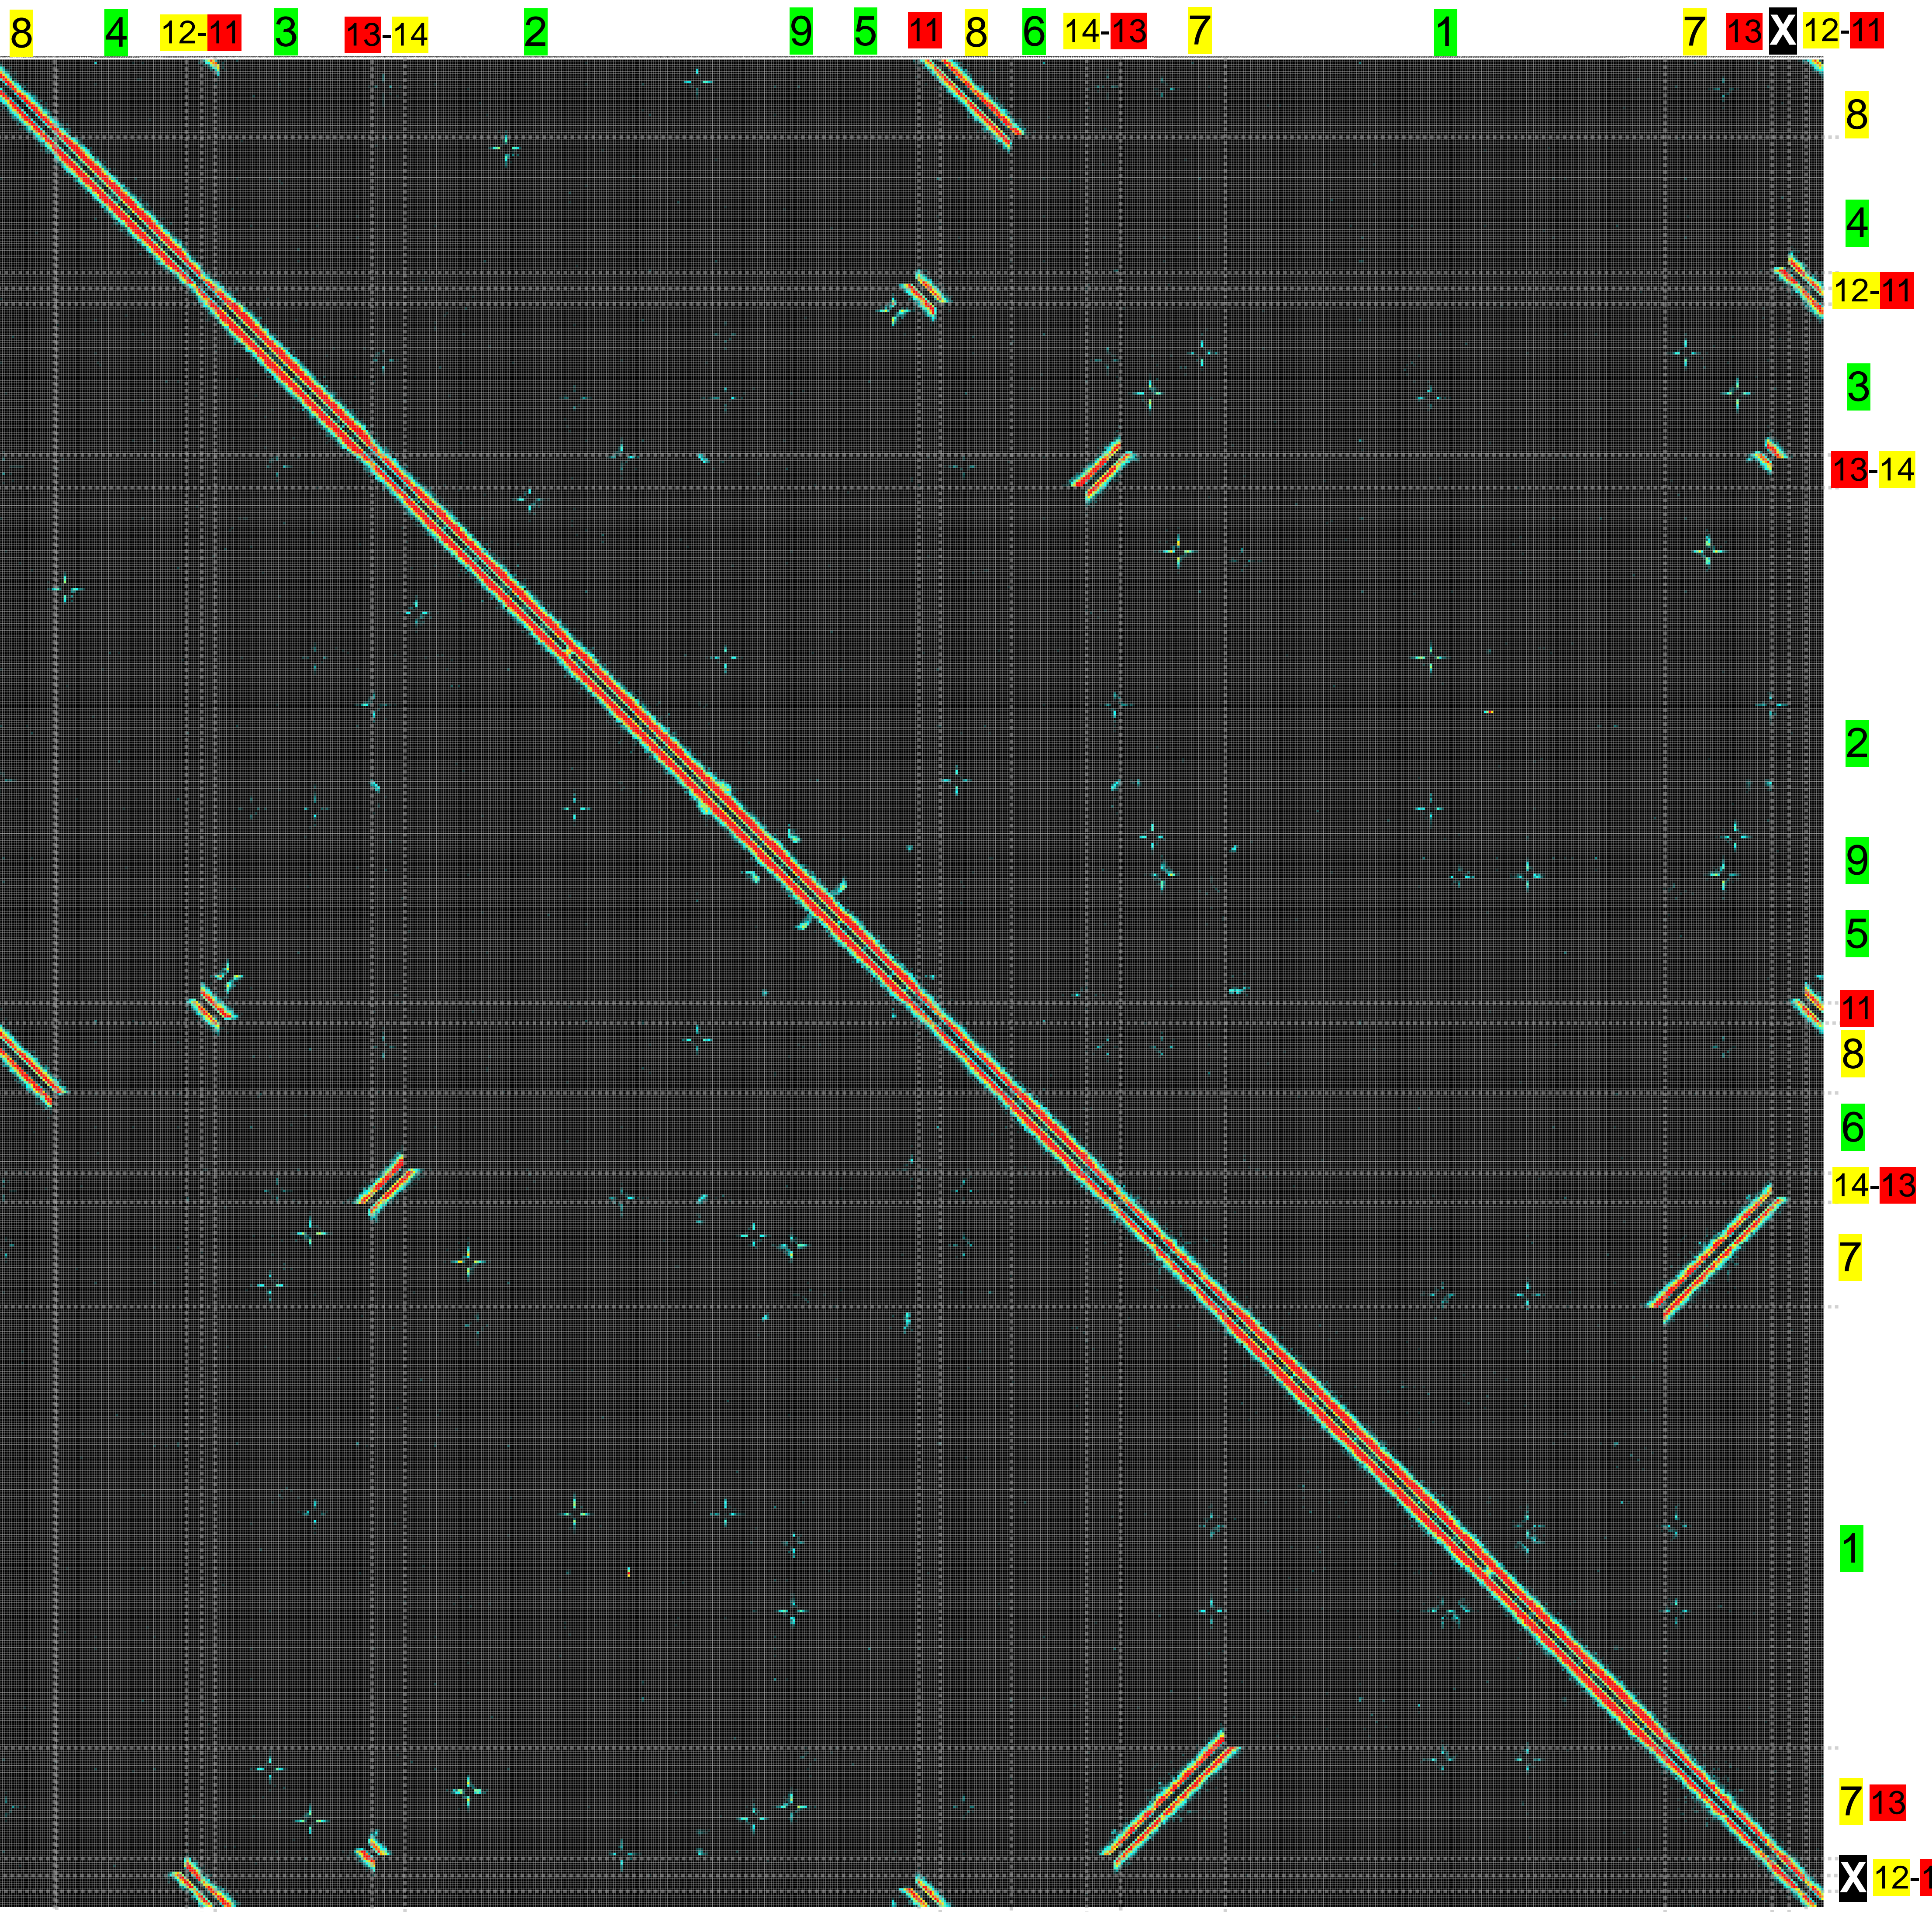

| Contig ID | Copy# | Length  |
|-----------|-------|---------|
| 1         | 1     | 186,341 |
| 2         | 1     | 172,341 |
| 3         | 1     | 63,894  |
| 4         | 1     | 56,950  |
| 5         | 1     | 29,925  |
| 6         | 1     | 32,568  |
| 7         | 2     | 43,847  |
| 8         | 2     | 31,854  |
| 9         | 1     | 15,237  |
| 10        | 1     | 7,954   |
| 11        | 3     | 7,686   |
| 12        | 2     | 6,421   |
| 13        | 3     | 1,653   |
| 14        | 2     | 12,500  |

Fourteen contigs derived after CLC assembly of the selected PacBio reads (SRX2719625) were ordered using the published linear assembly accession MH717173 along with autonomous element X (accession MH717174, contig 10) using additional information about the sequential order of contigs based on read-through data (reverse read mapping) and long distance analysis with mate-pair reads. Long distance analysis with mate-pair reads clearly demonstrated that the organization of *Leucaena trichandra* mitochondrial genome can be represented in the form of a cyclic graph. All genome segments are linked to each other through several repeats with potential complex rearrangements. Former autonomous element X was placed between a set of repeats that have different segmentation in other parts of the genome.

S8 Figure
