# Supplementary material for: The alternative reality of plant mitochondrial DNA: One ring does not rule them all
Source: PubMed Central journal article supplement (PMC6742443; doi:10.1371/journal.pgen.1008373), 2019-08-30
Supplement: pgen.1008373.s011.pdf [file pgen.1008373.s011.pdf]

Mitochondrial genome coordinates of primary structural units on representative GenBank files

S2A Table

| Primary structural units | Recombinogenic medium size repeats | Length | Orientation | <i>L.sativa</i> MK642355 (isoform A) |        |
|--------------------------|------------------------------------|--------|-------------|--------------------------------------|--------|
|                          |                                    |        |             | Start                                | End    |
| N (copy #1)              |                                    | 4116   | R           | 1                                    | 4116   |
|                          | X-01b (copy #1)                    | 576    | R           | 3541                                 | 4116   |
| M (copy #1)              |                                    | 30580  | R           | 4117                                 | 34696  |
| K                        |                                    | 78272  | R           | 34697                                | 112968 |
| N (copy #2)              |                                    | 4116   | R           | 112969                               | 117084 |
|                          | X-01b (copy #2)                    | 576    | R           | 116509                               | 117084 |
| M (copy #2)              |                                    | 30580  | R           | 117085                               | 147664 |
| Q                        |                                    | 11283  | R           | 147665                               | 158947 |
| T (copy #1)              |                                    | 3552   | R           | 158948                               | 162499 |
| P                        |                                    | 20468  | R           | 162500                               | 182967 |
| R (copy #1)              |                                    | 10430  | R           | 182968                               | 193397 |
| L                        |                                    | 44054  | R           | 193398                               | 237451 |
| T (copy #2)              |                                    | 3552   | R           | 237452                               | 241003 |
| U                        |                                    | 38613  | R           | 241004                               | 279616 |
| R (copy #2)              |                                    | 10430  | R           | 279617                               | 290046 |
| Z                        |                                    | 19295  | R           | 290047                               | 309341 |
|                          | X-01b (copy #3)                    | 576    | F           | 309342                               | 309917 |
| W                        |                                    | 53983  | R           | 309342                               | 363324 |

S2B Table

| Primary structural units | Recombinogenic medium size repeats | Length | Orientation | <i>L.serriola</i> MK820672 (isoform B) |        |
|--------------------------|------------------------------------|--------|-------------|----------------------------------------|--------|
|                          |                                    |        |             | Start                                  | End    |
| N (copy #1)              |                                    | 4116   | R           | 1                                      | 4116   |
|                          | X-01b (copy #1)                    | 576    | R           | 3541                                   | 4116   |
| M (copy #1)              |                                    | 30580  | R           | 4117                                   | 34696  |
| K                        |                                    | 78272  | R           | 34697                                  | 112968 |
| N (copy #2)              |                                    | 4116   | R           | 112969                                 | 117084 |
|                          | X-01b (copy #1)                    | 576    | R           | 116509                                 | 117084 |
| M (copy #2)              |                                    | 30580  | R           | 117085                                 | 147664 |
| Q                        |                                    | 11283  | R           | 147665                                 | 158947 |
| T (copy #1)              |                                    | 3552   | R           | 158948                                 | 162499 |
| U                        |                                    | 38617  | R           | 162500                                 | 201116 |
| R (copy #1)              |                                    | 10430  | R           | 201117                                 | 211546 |
| L                        |                                    | 44054  | R           | 211547                                 | 255600 |
| T (copy #2)              |                                    | 3552   | R           | 255601                                 | 259152 |
| P                        |                                    | 20468  | R           | 259153                                 | 279620 |
| R (copy #2)              |                                    | 10430  | R           | 279621                                 | 290050 |
| Z                        |                                    | 19295  | R           | 290051                                 | 309345 |
|                          | X-01b (copy #1)                    | 576    | F           | 309346                                 | 309921 |
| W                        |                                    | 53983  | R           | 309346                                 | 363328 |

S2C Table

| Primary structural units | Recombinogenic medium size repeats | Length | Orientation | <i>L.saligna</i> MK759657 |        |
|--------------------------|------------------------------------|--------|-------------|---------------------------|--------|
|                          |                                    |        |             | Start                     | End    |
| M (copy #1)              |                                    | 30534  | R           | 1                         | 30534  |
| K                        |                                    | 79109  | R           | 30535                     | 109643 |
| T (copy #1)              |                                    | 4048   | F           | 109644                    | 113691 |
| L                        |                                    | 43583  | F           | 113692                    | 157274 |
| R (copy #1)              |                                    | 10433  | F           | 157275                    | 167707 |
| P                        |                                    | 20420  | F           | 167708                    | 188127 |
| T (copy #2)              |                                    | 4048   | F           | 188128                    | 192175 |
| Q                        |                                    | 11083  | F           | 192176                    | 203258 |
| M (copy #2)              |                                    | 30534  | F           | 203259                    | 233792 |
|                          | X-01a (copy #1)                    | 877    | F           | 233793                    | 234669 |
| UV                       |                                    | 90023  | R           | 233793                    | 323815 |
| R (copy #2)              |                                    | 10433  | R           | 323816                    | 334248 |
| Z                        |                                    | 19278  | R           | 334249                    | 353526 |
|                          | X-01a (copy #2)                    | 877    | F           | 353527                    | 354403 |
|                          | S-01-IR (copy #1)                  | 1218   | F           | 353527                    | 354744 |
| S                        |                                    | 14743  | R           | 353527                    | 368269 |
|                          | S-01-IR (copy #2)                  | 1218   | R           | 367052                    | 368269 |
|                          | X-01a (copy #3)                    | 877    | R           | 367393                    | 368269 |
